# Supplementary material
Source: PubMed Central journal article supplement (PMC3491556)
Supplement: CVI.05663-11_zcd999094583so1.pdf [file CVI.05663-11_zcd999094583so1.pdf]

**Supplemental Table 1A. Local Reactogenicity for Sequential Vaccinations at 4 mg IM Biojector**

| Symptoms Intensity       | Vac. 1<br>(N=15)       | Vac. 2<br>(N=15) | Vac. 3<br>(N=13) | All Vac.<br>(N=15) |
|--------------------------|------------------------|------------------|------------------|--------------------|
|                          | number (%) of subjects |                  |                  |                    |
| <b>PAIN/TENDERNESS</b>   |                        |                  |                  |                    |
| None                     | 9 (60)                 | 5 (33)           | 7 (54)           | 5 (33)             |
| Mild                     | 6 (40)                 | 10 (67)          | 5 (39)           | 10 (67)            |
| Moderate                 | 0                      | 0                | 0                | 0                  |
| Severe                   | 0                      | 0                | 0                | 0                  |
| Missing                  | 0                      | 0                | 1 (8)            | 0                  |
| <b>SWELLING</b>          |                        |                  |                  |                    |
| None                     | 12 (80)                | 12 (80)          | 11 (85)          | 12 (80)            |
| Mild                     | 3 (20)                 | 3 (20)           | 1 (8)            | 3 (20)             |
| Moderate                 | 0                      | 0                | 0                | 0                  |
| Severe                   | 0                      | 0                | 0                | 0                  |
| Missing                  | 0                      | 0                | 1 (8)            | 0                  |
| <b>REDNESS</b>           |                        |                  |                  |                    |
| None                     | 9 (60)                 | 8 (53)           | 8 (62)           | 7 (47)             |
| Mild                     | 6 (40)                 | 7 (47)           | 4 (31)           | 8 (53)             |
| Moderate                 | 0                      | 0                | 0                | 0                  |
| Severe                   | 0                      | 0                | 0                | 0                  |
| Missing                  | 0                      | 0                | 1 (8)            | 0                  |
| <b>ANY LOCAL SYMPTOM</b> |                        |                  |                  |                    |
| None                     | 8 (53)                 | 5 (33)           | 5 (39)           | 5 (33)             |
| Mild                     | 7 (47)                 | 10 (67)          | 7 (54)           | 10 (67)            |
| Moderate                 | 0                      | 0                | 0                | 0                  |
| Severe                   | 0                      | 0                | 0                | 0                  |
| Missing                  | 0                      | 0                | 1 (8%)           | 0                  |

**Supplemental Table 1B. Systemic Reactogenicity for Sequential Vaccinations at 4 mg IM Biojector**

| Symptoms Intensity          | Vac. 1<br>(N=15)       | Vac. 2<br>(N=15) | Vac. 3<br>(N=13) | All Vac.<br>(N=15) |
|-----------------------------|------------------------|------------------|------------------|--------------------|
|                             | number (%) of subjects |                  |                  |                    |
| <b>MALAISE</b>              |                        |                  |                  |                    |
| None                        | 14 (93)                | 14 (93)          | 10 (77)          | 12 (80)            |
| Mild                        | 1 (7)                  | 1 (7)            | 2 (15)           | 3 (20)             |
| Moderate                    | 0                      | 0                | 0                | 0                  |
| Severe                      | 0                      | 0                | 0                | 0                  |
| Missing                     | 0                      | 0                | 1 (8)            | 0                  |
| <b>MYALGIA</b>              |                        |                  |                  |                    |
| None                        | 14 (93)                | 14 (93)          | 11 (85)          | 13 (87)            |
| Mild                        | 1 (7)                  | 1 (7)            | 1 (8)            | 2 (13)             |
| Moderate                    | 0                      | 0                | 0                | 0                  |
| Severe                      | 0                      | 0                | 0                | 0                  |
| Missing                     | 0                      | 0                | 1 (8)            | 0                  |
| <b>HEADACHE</b>             |                        |                  |                  |                    |
| None                        | 12 (80)                | 14 (93)          | 12 (92)          | 12 (80)            |
| Mild                        | 3 (20)                 | 1 (7)            | 0                | 3 (20)             |
| Moderate                    | 0                      | 0                | 0                | 0                  |
| Severe                      | 0                      | 0                | 0                | 0                  |
| Missing                     | 0                      | 0                | 1 (8)            | 0                  |
| <b>CHILLS</b>               |                        |                  |                  |                    |
| None                        | 15 (100)               | 15 (100)         | 12 (92)          | 15 (100)           |
| Mild                        | 0                      | 0                | 0                | 0                  |
| Moderate                    | 0                      | 0                | 0                | 0                  |
| Severe                      | 0                      | 0                | 0                | 0                  |
| Missing                     | 0                      | 0                | 1 (8)            | 0                  |
| <b>NAUSEA</b>               |                        |                  |                  |                    |
| None                        | 15 (100)               | 15 (100)         | 12 (92)          | 15 (100)           |
| Mild                        | 0                      | 0                | 0                | 0                  |
| Moderate                    | 0                      | 0                | 0                | 0                  |
| Severe                      | 0                      | 0                | 0                | 0                  |
| Missing                     | 0                      | 0                | 1 (8)            | 0                  |
| <b>TEMPERATURE</b>          |                        |                  |                  |                    |
| None                        | 15 (100)               | 15 (100)         | 12 (92)          | 15 (100)           |
| Mild                        | 0                      | 0                | 0                | 0                  |
| Moderate                    | 0                      | 0                | 0                | 0                  |
| Severe                      | 0                      | 0                | 0                | 0                  |
| Missing                     | 0                      | 0                | 1 (8)            | 0                  |
| <b>ANY SYSTEMIC SYMPTOM</b> |                        |                  |                  |                    |
| None                        | 12 (80)                | 13 (87)          | 10 (77)          | 10 (67)            |
| Mild                        | 3 (20)                 | 2 (13)           | 2 (15)           | 5 (33)             |
| Moderate                    | 0                      | 0                | 0                | 0                  |
| Severe                      | 0                      | 0                | 0                | 0                  |
| Missing                     | 0                      | 0                | 1 (8)            | 0                  |

**Supplemental Table 2A. Local Reactogenicity for Sequential Vaccinations at \*1 mg ID Biojector**

| Symptoms Intensity       | Vac. 1<br>(N=11)       | Vac. 2<br>(N=10) | Vac. 3<br>(N=10) | All Vac.<br>(N=11) |
|--------------------------|------------------------|------------------|------------------|--------------------|
|                          | number (%) of subjects |                  |                  |                    |
| <b>PAIN/TENDERNESS</b>   |                        |                  |                  |                    |
| None                     | 5 (46)                 | 5 (50)           | 6 (60)           | 3 (27)             |
| Mild                     | 6 (55)                 | 5 (50)           | 4 (40)           | 8 (73)             |
| Moderate                 | 0                      | 0                | 0                | 0                  |
| Severe                   | 0                      | 0                | 0                | 0                  |
| Missing                  | 0                      | 0                | 0                | 0                  |
| <b>SWELLING</b>          |                        |                  |                  |                    |
| None                     | 8 (73)                 | 9 (90)           | 9 (90)           | 8 (73)             |
| Mild                     | 3 (27)                 | 1 (10)           | 1 (10)           | 3 (27)             |
| Moderate                 | 0                      | 0                | 0                | 0                  |
| Severe                   | 0                      | 0                | 0                | 0                  |
| Missing                  | 0                      | 0                | 0                | 0                  |
| <b>REDNESS</b>           |                        |                  |                  |                    |
| None                     | 6 (55)                 | 7 (70)           | 6 (60)           | 4 (36)             |
| Mild                     | 5 (46)                 | 3 (30)           | 4 (40)           | 7 (64)             |
| Moderate                 | 0                      | 0                | 0                | 0                  |
| Severe                   | 0                      | 0                | 0                | 0                  |
| Missing                  | 0                      | 0                | 0                | 0                  |
| <b>ANY LOCAL SYMPTOM</b> |                        |                  |                  |                    |
| None                     | 4 (36)                 | 5 (50)           | 5 (50)           | 2 (18)             |
| Mild                     | 7 (64)                 | 5 (50)           | 5 (50)           | 9 (82)             |
| Moderate                 | 0                      | 0                | 0                | 0                  |
| Severe                   | 0                      | 0                | 0                | 0                  |
| Missing                  | 0                      | 0                | 0                | 0                  |

\*Administered by Biojector as two 0.5 mg injections into the same arm

**Supplemental Table 2B. Systemic Reactogenicity for Sequential Vaccinations at \*1 mg ID Biojector**

| Symptoms Intensity          | Vac. 1<br>(N=11)       | Vac. 2<br>(N=10) | Vac. 3<br>(N=10) | All Vac.<br>(N=11) |
|-----------------------------|------------------------|------------------|------------------|--------------------|
|                             | number (%) of subjects |                  |                  |                    |
| <b>MALAISE</b>              |                        |                  |                  |                    |
| None                        | 11 (100)               | 10 (100)         | 9 (90)           | 10 (91)            |
| Mild                        | 0                      | 0                | 1 (10)           | 1 (9)              |
| Moderate                    | 0                      | 0                | 0                | 0                  |
| Severe                      | 0                      | 0                | 0                | 0                  |
| Missing                     | 0                      | 0                | 0                | 0                  |
| <b>MYALGIA</b>              |                        |                  |                  |                    |
| None                        | 8 (73)                 | 9 (90)           | 9 (90)           | 8 (73)             |
| Mild                        | 3 (27)                 | 1 (10)           | 1 (10)           | 3 (27)             |
| Moderate                    | 0                      | 0                | 0                | 0                  |
| Severe                      | 0                      | 0                | 0                | 0                  |
| Missing                     | 0                      | 0                | 0                | 0                  |
| <b>HEADACHE</b>             |                        |                  |                  |                    |
| None                        | 6 (55)                 | 4 (40)           | 7 (70)           | 4 (36)             |
| Mild                        | 5 (46)                 | 6 (60)           | 3 (30)           | 7 (64)             |
| Moderate                    | 0                      | 0                | 0                | 0                  |
| Severe                      | 0                      | 0                | 0                | 0                  |
| Missing                     | 0                      | 0                | 0                | 0                  |
| <b>CHILLS</b>               |                        |                  |                  |                    |
| None                        | 11 (100)               | 10 (100)         | 10 (100)         | 11 (100)           |
| Mild                        | 0                      | 0                | 0                | 0                  |
| Moderate                    | 0                      | 0                | 0                | 0                  |
| Severe                      | 0                      | 0                | 0                | 0                  |
| Missing                     | 0                      | 0                | 0                | 0                  |
| <b>NAUSEA</b>               |                        |                  |                  |                    |
| None                        | 10 (91)                | 10 (100)         | 9 (90)           | 10 (91)            |
| Mild                        | 1 (9)                  | 0                | 1 (10)           | 1 (9)              |
| Moderate                    | 0                      | 0                | 0                | 0                  |
| Severe                      | 0                      | 0                | 0                | 0                  |
| Missing                     | 0                      | 0                | 0                | 0                  |
| <b>TEMPERATURE</b>          |                        |                  |                  |                    |
| None                        | 11 (100)               | 10 (100)         | 10 (100)         | 11 (100)           |
| Mild                        | 0                      | 0                | 0                | 0                  |
| Moderate                    | 0                      | 0                | 0                | 0                  |
| Severe                      | 0                      | 0                | 0                | 0                  |
| Missing                     | 0                      | 0                | 0                | 0                  |
| <b>ANY SYSTEMIC SYMPTOM</b> |                        |                  |                  |                    |
| None                        | 5 (46)                 | 4 (40)           | 7 (70)           | 3 (27)             |
| Mild                        | 6 (55)                 | 6 (60)           | 3 (30)           | 8 (73)             |
| Moderate                    | 0                      | 0                | 0                | 0                  |
| Severe                      | 0                      | 0                | 0                | 0                  |
| Missing                     | 0                      | 0                | 0                | 0                  |

\*Administered by Biojector as two 0.5 mg injections into the same arm
